# Supplementary material for: Synthesis, Biological Activity, and Molecular Modeling Studies of Pyrazole and Triazole Derivatives as Selective COX-2 Inhibitors
Source: Hindawi journal article supplement (doi:10.1155/2020/6393428), 2020-03-24
Supplement: f1 [file 6393428.f1.docx]

**Supporting Information**

**Synthesis, biological activity and molecular modeling studies of pyrazole and triazole derivatives as selective COX-2 inhibitors**

Mohyeddin Assalia*, Murad Abualhasana, Hadeel Sawaftaha, Mohammed Hawasha, Abdurrahman Olgacb,c, Ahmed Mousad


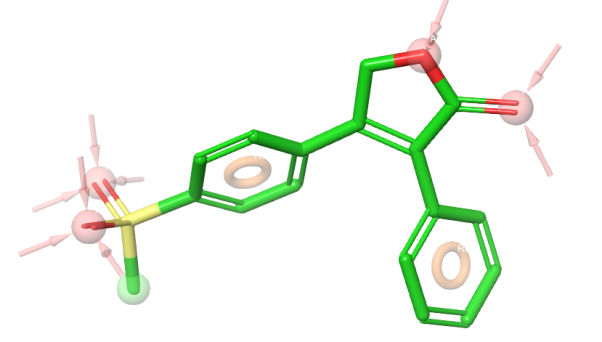

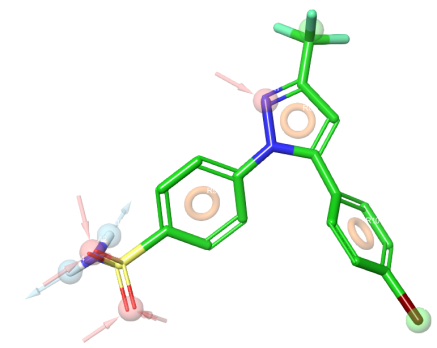


**Figure S1.** Pharmacophore features of SC-558 and Rofecoxib.


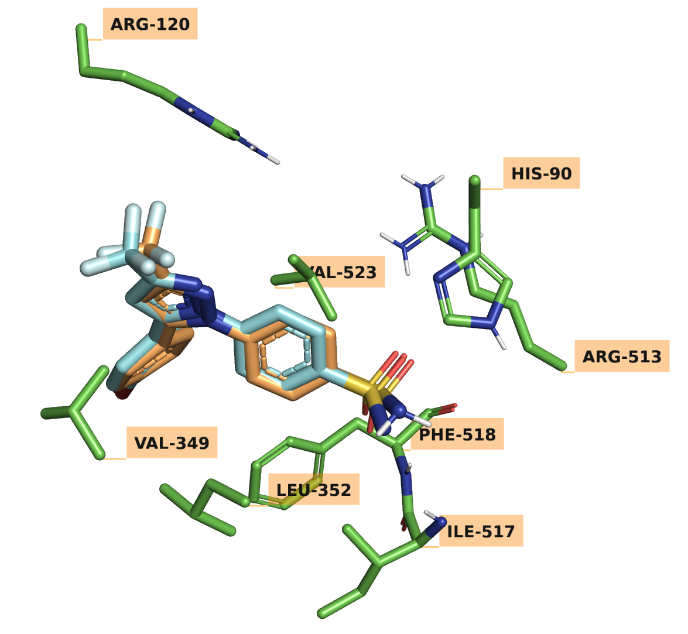


**Figure S2.** Binding orientation of SC-558 (cyan) in 6COX and the docking result of SC-558 (orange) in 5KIR.


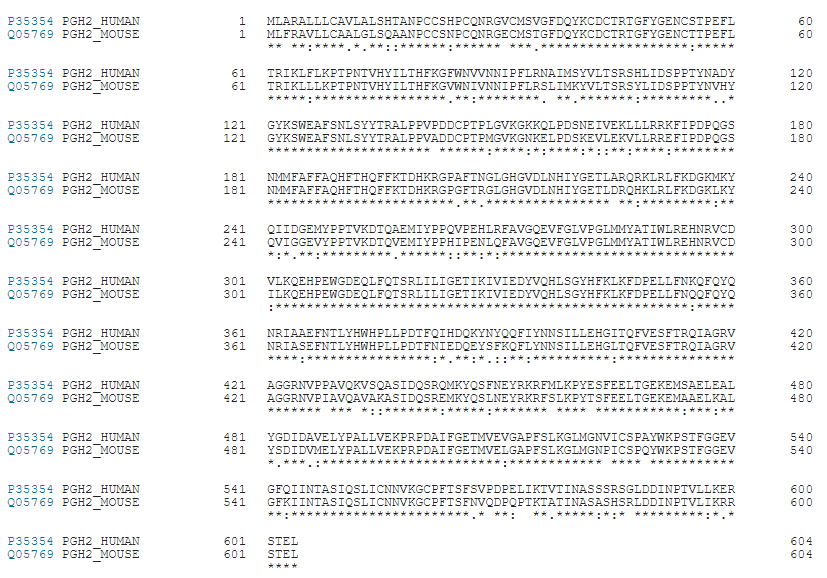


**Figure S3.** Sequence Alignment results of COX-2 sequence in *Homo sapiens* (Human) and *Mus musculus* (Mouse)
